# Supplementary material
Source: MDPI journal article supplement (https://www.mdpi.com/2076-3417/13/4/2646)
Supplement: s1 [file s1]

**Table S1.** Linear correlation coefficients between target meteorological variables and input variables from ERA and PCA datasets.

| Input                         | Pa          | Ta          | IR          | RH          | WS          | WD          | Rn          | Ts          |
|-------------------------------|-------------|-------------|-------------|-------------|-------------|-------------|-------------|-------------|
| ERA dataset                   |             |             |             |             |             |             |             |             |
| 2 m temperature               | -0.43       | 0.95        | 0.29        | 0.01        | 0.04        | -0.03       | 0.30        | 0.79        |
| 2 m dewpoint                  | -0.39       | <b>0.98</b> | 0.43        | -0.19       | 0.09        | -0.02       | 0.43        | 0.85        |
| 10 m U wind component         | -0.13       | -0.02       | 0.03        | -0.04       | 0.16        | <b>0.61</b> | -           | -0.13       |
| 10 m V wind component         | 0.01        | -0.05       | -0.10       | -           | -0.02       | 0.09        | -0.09       | -0.18       |
| Evaporation (EV)              | 0.11        | -0.58       | -0.74       | 0.59        | -0.19       | -           | -0.80       | -0.67       |
| EV from bare soil             | 0.12        | -0.60       | -0.72       | 0.60        | -0.23       | -           | -0.78       | -0.69       |
| EV open water surfaces        | 0.22        | -0.24       | -0.10       | -0.09       | -0.20       | -0.03       | -0.11       | -0.26       |
| EV from the top of canopy     | 0.18        | -0.43       | -0.24       | 0.19        | -0.21       | 0.04        | -0.24       | -0.53       |
| EV vegetation transpiration   | 0.19        | -0.63       | -0.75       | 0.57        | -0.31       | -0.02       | -0.79       | -0.70       |
| Forecast albedo               | 0.25        | -0.79       | -0.29       | 0.12        | 0.01        | 0.04        | -0.34       | -0.78       |
| LAI high vegetation           | -0.31       | 0.78        | 0.30        | -0.06       | -0.04       | -0.11       | 0.33        | 0.89        |
| LAI low vegetation            | -0.31       | 0.78        | 0.30        | -0.06       | -0.04       | -0.11       | 0.33        | 0.89        |
| Potential evaporation         | 0.15        | -0.62       | -0.74       | 0.69        | -0.34       | -0.03       | -0.74       | -0.64       |
| Runoff                        | 0.10        | -0.54       | -0.24       | 0.19        | 0.08        | 0.05        | -0.31       | -0.58       |
| Skin reservoir content        | -0.40       | 0.98        | 0.45        | -0.20       | 0.11        | -0.02       | 0.45        | 0.86        |
| Skin temperature              | -0.24       | 0.30        | 0.11        | 0.02        | -0.04       | -0.10       | 0.14        | 0.57        |
| Snow albedo                   | 0.27        | -0.77       | -0.28       | 0.10        | 0.02        | 0.05        | -0.34       | -0.81       |
| Snow cover                    | 0.14        | -0.31       | -0.04       | -0.09       | 0.09        | 0.10        | -0.14       | -0.59       |
| Snow density                  | 0.24        | -0.50       | -0.12       | -0.02       | 0.07        | 0.06        | -0.24       | -0.60       |
| Snow depth                    | 0.27        | -0.63       | -0.19       | 0.02        | 0.05        | 0.04        | -0.28       | -0.64       |
| Snow depth water equivalent   | 0.02        | 0.10        | -0.16       | 0.22        | -0.25       | -0.10       | 0.02        | 0.27        |
| Snow evaporation              | -0.16       | -0.14       | -0.12       | 0.17        | 0.13        | -0.06       | -0.09       | -0.20       |
| Snowfall                      | -0.06       | 0.06        | 0.12        | -0.07       | 0.07        | 0.04        | 0.08        | -0.12       |
| ST level 1                    | -0.29       | 0.86        | 0.40        | -0.21       | -           | -0.08       | 0.43        | <b>0.97</b> |
| ST level 2                    | -0.29       | 0.80        | 0.30        | -0.08       | -0.05       | -0.10       | 0.33        | 0.93        |
| ST level 3                    | -0.26       | 0.59        | 0.14        | 0.10        | -0.09       | -0.09       | 0.18        | 0.70        |
| ST level 4                    | -           | -0.17       | -0.27       | 0.35        | -0.13       | -           | -0.21       | -0.13       |
| Sub-surface runoff            | -0.03       | 0.19        | 0.12        | -0.12       | 0.05        | -0.01       | 0.14        | 0.23        |
| Surface latent heat flux      | 0.19        | -0.63       | -0.76       | 0.57        | -0.31       | -0.02       | -0.79       | -0.70       |
| Surface net solar radiation   | -0.09       | 0.54        | 0.89        | -0.64       | 0.26        | 0.04        | <b>0.88</b> | 0.54        |
| Surface net thermal radiation | -0.09       | -0.34       | -0.42       | 0.53        | 0.07        | -0.06       | -0.34       | -0.36       |
| Surface pressure              | <b>0.99</b> | -0.42       | -0.07       | -0.14       | -0.26       | -0.08       | -0.07       | -0.28       |
| Surface runoff                | -0.07       | 0.06        | 0.05        | -           | 0.05        | 0.02        | 0.04        | -0.03       |
| Surface sensible heat flux    | 0.03        | -0.28       | -0.80       | 0.45        | -0.20       | -0.02       | -0.77       | -0.32       |
| Surface solar radiation       | -0.08       | 0.49        | <b>0.91</b> | -0.65       | 0.28        | 0.06        | 0.84        | 0.46        |
| Surface thermal radiation     | -0.45       | 0.87        | 0.25        | 0.04        | 0.13        | -0.06       | 0.31        | 0.77        |
| Temperature of snow layer     | -0.42       | 0.85        | 0.27        | -0.02       | 0.15        | 0.04        | 0.25        | 0.52        |
| Total precipitation           | -0.25       | 0.10        | -0.05       | 0.19        | 0.15        | -0.03       | -0.03       | 0.09        |
| VSW layer 1                   | -0.03       | -0.24       | -0.10       | 0.09        | 0.14        | 0.10        | -0.11       | -0.43       |
| VSW layer 2                   | -0.02       | -0.13       | -0.02       | -0.02       | 0.13        | 0.10        | -0.02       | -0.33       |
| VSW layer 3                   | -0.03       | 0.06        | 0.11        | -0.18       | 0.14        | 0.05        | 0.13        | -0.04       |
| VSW layer 4                   | -0.03       | 0.21        | 0.12        | -0.11       | 0.03        | -0.03       | 0.15        | 0.25        |
| Relative air humidity         | -0.13       | -0.29       | -0.61       | <b>0.83</b> | -0.21       | -0.02       | -0.55       | -0.38       |
| Wind speed at 10 m            | -0.28       | 0.10        | 0.10        | -0.13       | <b>0.80</b> | 0.13        | 0.08        | -0.05       |
| Wind direction at 10 m        | 0.07        | 0.05        | -0.02       | 0.02        | -0.02       | -0.58       | -           | 0.10        |

|               |       |       |       |       |       |       |       |       |
|---------------|-------|-------|-------|-------|-------|-------|-------|-------|
| Net radiation | -0.12 | 0.51  | 0.88  | -0.58 | 0.30  | 0.04  | 0.88  | 0.52  |
| Snowmelt      | -0.32 | 0.88  | 0.57  | -0.32 | 0.13  | -0.05 | 0.61  | 0.93  |
| PCA dataset   |       |       |       |       |       |       |       |       |
| PCA var 1     | 0.15  | -     | 0.64  | -0.65 | 0.32  | 0.12  | 0.58  | -0.09 |
| PCA var 2     | -0.27 | 0.16  | -0.16 | 0.20  | 0.08  | 0.06  | -0.17 | -0.14 |
| PCA var 3     | 0.34  | -0.13 | -0.12 | -0.08 | -0.20 | -     | -0.07 | -0.04 |
| PCA var 4     | -0.17 | 0.15  | -     | -     | 0.04  | 0.17  | -0.08 | -0.19 |
| PCA var 5     | 0.36  | -0.03 | 0.04  | -0.13 | -0.22 | -     | 0.03  | -0.04 |
| PCA var 6     | -0.04 | 0.13  | -0.05 | -0.10 | -0.08 | 0.05  | -0.17 | 0.05  |
| PCA var 7     | 0.02  | -0.09 | 0.01  | -     | 0.14  | 0.12  | -0.09 | -0.01 |
| PCA var 8     | -0.23 | -0.11 | 0.07  | 0.03  | 0.18  | 0.37  | 0.04  | -0.20 |
| PCA var 9     | 0.04  | -0.06 | 0.02  | -0.02 |       | -0.29 | -0.03 | -0.07 |
| PCA var 10    | 0.37  | -0.03 | 0.11  | -     | -0.07 | -0.22 | 0.03  | -0.12 |
| PCA var 11    | -0.24 | 0.04  | 0.10  | 0.09  | 0.01  | -0.13 | 0.12  | 0.05  |
| PCA var 12    | 0.06  | 0.02  | -     | 0.13  | -0.07 | 0.09  | 0.08  | -0.05 |
| PCA var 13    | 0.02  | 0.01  | 0.12  | 0.04  | -0.24 | 0.06  | 0.07  | 0.02  |
| PCA var 14    | 0.21  | -0.01 | -0.07 | -0.04 | 0.06  | 0.03  | -0.06 | -0.03 |
| PCA var 15    | 0.54  | -     | -     | -0.01 | -     | 0.15  | -     | 0.01  |
| PCA var 16    | -0.03 | -     | 0.17  | -     | -0.05 | 0.07  | 0.11  | 0.03  |
| PCA var 17    | -     | -     | -0.01 | -0.02 | -0.08 | -     | -0.02 | -     |
| PCA var 18    | -0.20 | 0.04  | -0.05 | -0.10 | 0.02  | 0.03  | -0.03 | 0.13  |
| PCA var 19    | -     | 0.03  | 0.08  | 0.07  | -0.02 | 0.07  | 0.06  | 0.04  |
| PCA var 20    | 0.07  | 0.04  | 0.01  | -0.06 | -     | -     | 0.02  | 0.10  |
| PCA var 21    | -0.02 | -0.04 | -0.03 | 0.06  | -0.02 | -     | -     | -     |
| PCA var 22    | 0.01  | -0.10 | -0.02 | 0.13  | -0.13 | -0.04 | 0.02  | -0.03 |
| PCA var 23    | -0.07 | -0.04 | 0.01  | -0.07 | -0.04 | 0.04  | 0.03  | 0.02  |
| PCA var 24    | 0.03  | 0.13  | 0.04  | 0.05  | -0.07 | 0.01  | -     | 0.21  |
| PCA var 25    | -0.08 | 0.13  | 0.09  | -0.05 | 0.06  | -     | 0.10  | 0.06  |

Notes: “-“ – nonsignificant correlations at  $p>0.01$ , the largest correlation in columns indicated in bold.

**Table S2.** Long-term (2010-2021) mean values of meteorological variables according to various models.

| Model id     | Pa,<br>hPa | Ta,<br>°C | IR,<br>μmol/m <sup>2</sup> /s | RH,<br>% | WS,<br>m/s | WD,<br>deg | Rn,<br>W/m <sup>2</sup> | Ts,<br>°C |
|--------------|------------|-----------|-------------------------------|----------|------------|------------|-------------------------|-----------|
| ERA          | 1010.6     | -3.7      | 157.2                         | 75.8     | 2.6        | 157.4      | 39.3                    | 4.6       |
| dbERA        | 1014.1     | -0.5      | 188.7                         | 78.0     | 3.5        | 193.9      | 33.6                    | 6.2       |
| LM (ERA)     | 1014.1     | -0.8      | 195.9                         | 78.4     | 3.4        | 193.2      | 33.6                    | 6.1       |
| LMI (ERA)    | 1014.2     | -0.7      | 200.6                         | 78.4     | 3.4        | 196.8      | 35.3                    | 6.2       |
| GPRexp (ERA) | 1014.2     | -0.8      | 193.4                         | 78.4     | 3.4        | 194.6      | 34.5                    | 6.1       |
| GPR2 (ERA)   | 1014.2     | -0.8      | 193.0                         | 78.4     | 3.4        | 193.8      | 34.4                    | 6.1       |
| NN (ERA)     | 1014.3     | -0.5      | 207.0                         | 78.1     | 3.3        | 191.8      | 35.3                    | 6.1       |
| LM (PC)      | 1014.1     | -0.8      | 195.5                         | 78.3     | 3.4        | 192.4      | 32.4                    | 6.1       |
| LMI (PC)     | 1014.1     | -1.0      | 196.0                         | 78.4     | 3.4        | 197.8      | 34.9                    | 6.2       |
| GPRexp (PC)  | 1014.1     | -0.7      | 196.3                         | 78.2     | 3.4        | 195.8      | 34.6                    | 6.1       |
| GPR2 (PC)    | 1014.1     | -0.8      | 196.9                         | 78.3     | 3.4        | 195.5      | 34.3                    | 6.1       |
| NN (PC)      | 1014.2     | -0.9      | 196.0                         | 78.1     | 3.4        | 194.0      | 35.1                    | 6.2       |

**Table S3.** Standard deviation (2010-2021) values of meteorological variables according to various models.

| Model id | Pa,<br>hPa | Ta,<br>°C | IR,<br>μmol/m <sup>2</sup> /s | RH,<br>% | WS,<br>m/s | WD,<br>deg | Rn,<br>W/m <sup>2</sup> | Ts,<br>°C |
|----------|------------|-----------|-------------------------------|----------|------------|------------|-------------------------|-----------|
| ERA      | 12.1       | 13.2      | 254.7                         | 13.9     | 1.0        | 95.6       | 132.0                   | 8.2       |

|              |      |      |       |      |     |      |       |     |
|--------------|------|------|-------|------|-----|------|-------|-----|
| dbERA        | 11.8 | 14.7 | 300.8 | 13.5 | 1.5 | 58.6 | 105.3 | 8.0 |
| LM (ERA)     | 11.9 | 15.0 | 300.1 | 14.3 | 1.5 | 67.3 | 107.3 | 8.0 |
| LMI (ERA)    | 11.9 | 15.0 | 306.5 | 14.8 | 1.6 | 75.8 | 110.8 | 8.0 |
| GPRexp (ERA) | 11.9 | 15.0 | 313.3 | 15.3 | 1.6 | 74.9 | 112.8 | 8.0 |
| GPR2 (ERA)   | 11.9 | 15.0 | 313.2 | 15.2 | 1.6 | 80.1 | 112.0 | 8.1 |
| NN (ERA)     | 12.1 | 14.7 | 331.1 | 14.9 | 1.6 | 78.4 | 110.8 | 8.0 |
| LM (PC)      | 11.9 | 15.0 | 295.1 | 13.2 | 1.1 | 63.2 | 105.8 | 8.0 |
| LMI (PC)     | 11.9 | 15.1 | 301.5 | 14.7 | 1.7 | 76.6 | 119.5 | 7.9 |
| GPRexp (PC)  | 11.9 | 14.8 | 309.9 | 15.0 | 1.5 | 71.3 | 111.8 | 8.0 |
| GPR2 (PC)    | 11.9 | 15.0 | 309.4 | 14.9 | 1.5 | 71.3 | 113.3 | 8.1 |
| NN (PC)      | 12.1 | 15.3 | 304.6 | 14.7 | 1.6 | 75.3 | 108.7 | 8.1 |

---
